# Supplementary material for: Prevalence and characteristics of vascular cognitive impairment in a European cohort of adult patients with Moyamoya angiopathy
Source: PubMed Central journal article supplement (PMC11377615; doi:10.1007/s00415-024-12555-2), 2024-07-17
Supplement: 415_2024_12555_MOESM1_ESM.pdf [file 415_2024_12555_MOESM1_ESM.pdf]

## **Prevalence and characteristics of vascular cognitive impairment in a European cohort of adult patients with Moyamoya angiopathy**

Journal of Neurology

Marine Giroud (MD)<sup>1</sup>; Lionel Calviere (MD)<sup>1,2</sup>; Carla Machado (MSc)<sup>3</sup>; Sonia Reyes (MSc)<sup>3</sup>; H el ene Mirabel (MSc)<sup>1</sup>; Nicolas Raposo (MD, PHD)<sup>1,2</sup>; Pierre Brandicourt (MD)<sup>4</sup>; Alain Viguier (MD)<sup>1,2</sup>; Jean-Fran ois Albucher (MD)<sup>1,2</sup>; Fabrice Bonneville (MD, PHD)<sup>2,5</sup>; Jean Marc Olivot (MD, PHD)<sup>1,2</sup>; Patrice P eran (PHD)<sup>2</sup>; J er emie Pariente (MD, PHD)<sup>1,2</sup>; Dominique Herv e (MD)<sup>3</sup>; M elanie Planton (PHD)<sup>1,2</sup>

1. Neurology Department, Toulouse University Hospital, France
2. ToNIC, Toulouse NeuroImaging Center, Toulouse University, France
3. Neurology Department, Hospital Paris Lariboisi ere, France
4. Neuroradiology Department, Toulouse University Hospital, France
5. Neuroradiology Department, Toulouse University Hospital, France

Marine GIROUD, Neurology Department, Toulouse University Hospital, France; giroud.m@chu-toulouse.fr

|                                                       | <b>Executive domain</b> |              |                |
|-------------------------------------------------------|-------------------------|--------------|----------------|
|                                                       | <i>No VCIND</i>         | <i>VCIND</i> | <i>P-value</i> |
| Number of patients                                    | 76                      | 26           |                |
| <b>Clinical characteristics</b>                       |                         |              |                |
| Men, n (%)                                            | 27 (36)                 | 9 (35)       | 0.93           |
| Age at diagnosis, mean (SD)                           | 39.2 ± 19.8             | 40.1 ± 14.2  | 1.00           |
| Age at first neuropsychological assessment, mean (SD) | 43 ± 13.4               | 42.8 ± 12    | 1.00           |
| Delay first symptom/diagnosis (day), median (IQ)      | 68 (1-656)              | 49 (0-190.8) | 0.31           |
| Disease, n (%)                                        | 46 (61)                 | 17 (65)      | 0.66           |
| Vascular event at diagnosis, n (%)                    | 53 (70)                 | 21 (81)      | 0.28           |
| TIA and ischemic strokes                              | 43 (57)                 | 16 (62)      | 0.66           |
| Ischemic stroke                                       | 33 (43)                 | 15 (58)      | 0.20           |
| All strokes                                           | 43 (57)                 | 20 (77)      | 0.07           |
| Hypertension, n (%)                                   | 24 (32)                 | 6 (23)       | 0.41           |
| Smoking, n (%)                                        | 28 (37)                 | 9 (35)       | 0.84           |
| Dyslipidemia, n (%)                                   | 15 (20)                 | 7 (27)       | 0.46           |
| <b>Radiological characteristics</b>                   |                         |              |                |
| Bilateral involvement, n (%)                          | 47 (62)                 | 16 (62)      | 0.98           |
| Transdural involvement, n (%)                         | 17 (22)                 | 4 (15)       | -              |
| Vertebro-basilar involvement, n (%)                   | 10 (13)                 | 6 (23)       | 0.23           |
| Presence of ischemic lesions on MRI, n (%)            | 52 (68)                 | 23 (88)      | 0.046*         |
| Presence of hemorrhagic lesions on MRI, n (%)         | 11 (14)                 | 5 (19)       | 0.57           |

Table S1: Clinical and radiological characteristics of patients with MMA with and without executive impairment

|                                                       | <b>Speed processing/attention domain</b> |               |                |
|-------------------------------------------------------|------------------------------------------|---------------|----------------|
|                                                       | <i>No VCIND</i>                          | <i>VCIND</i>  | <i>P-value</i> |
| Number of patients                                    | 76                                       | 25            |                |
| <b>Clinical characteristics</b>                       |                                          |               |                |
| Men, n (%)                                            | 29 (38)                                  | 6 (24)        | 0.20           |
| Age at diagnosis, mean (SD)                           | 38.8 ± 19.6                              | 40.7 ± 14.9   | 0.46           |
| Age at first neuropsychological assessment, mean (SD) | 42.1 ± 13.2                              | 45 ± 12.5     | 0.21           |
| Delay first symptom/diagnosis (day), median (IQ)      | 45 (1-497)                               | 133 (0-666.5) | 0.88           |
| Disease, n (%)                                        | 47 (62)                                  | 16 (64)       | 0.85           |
| Vascular event at diagnosis, n (%)                    | 51 (67)                                  | 22 (88)       | 0.043*         |
| TIA and ischemic strokes                              | 41 (54)                                  | 18 (72)       | 0.11           |
| Ischemic stroke                                       | 31 (41)                                  | 17 (68)       | 0.018*         |
| All strokes                                           | 41 (54)                                  | 21 (84)       | 0.007*         |
| Hypertension, n (%)                                   | 21 (28)                                  | 9 (36)        | 0.43           |
| Smoking, n (%)                                        | 25 (33)                                  | 12 (48)       | 0.17           |
| Dyslipidemia, n (%)                                   | 13 (17)                                  | 9 (36)        | 0.051          |
| <b>Radiological characteristics</b>                   |                                          |               |                |
| Bilateral involvement, n (%)                          | 47 (62)                                  | 16 (64)       | 0.85           |
| Transdural involvement, n (%)                         | 16 (21)                                  | 5 (20)        | 0.94           |
| Vertebro-basilar involvement, n (%)                   | 10 (13)                                  | 6 (24)        | 0.20           |
| Presence of ischemic lesions on MRI, n (%)            | 53 (70)                                  | 22 (88)       | 0.07           |
| Presence of hemorrhagic lesions on MRI, n (%)         | 11 (14)                                  | 4 (16)        | -              |

Table S2: Clinical and radiological characteristics of patients with MMA with and without attention/speed impairment
